# Supplementary material for: Casein Hydrolysate and Casein–Iron Chelate as Natural Bioactive Compounds for Yoghurt Fortification
Source: MDPI journal article supplement (doi:10.3390/app122412903), 2022-12-15
Supplement: s1 [file s1]

**Figure S1. Casein hydrolysate and iron chelate production flow chart**

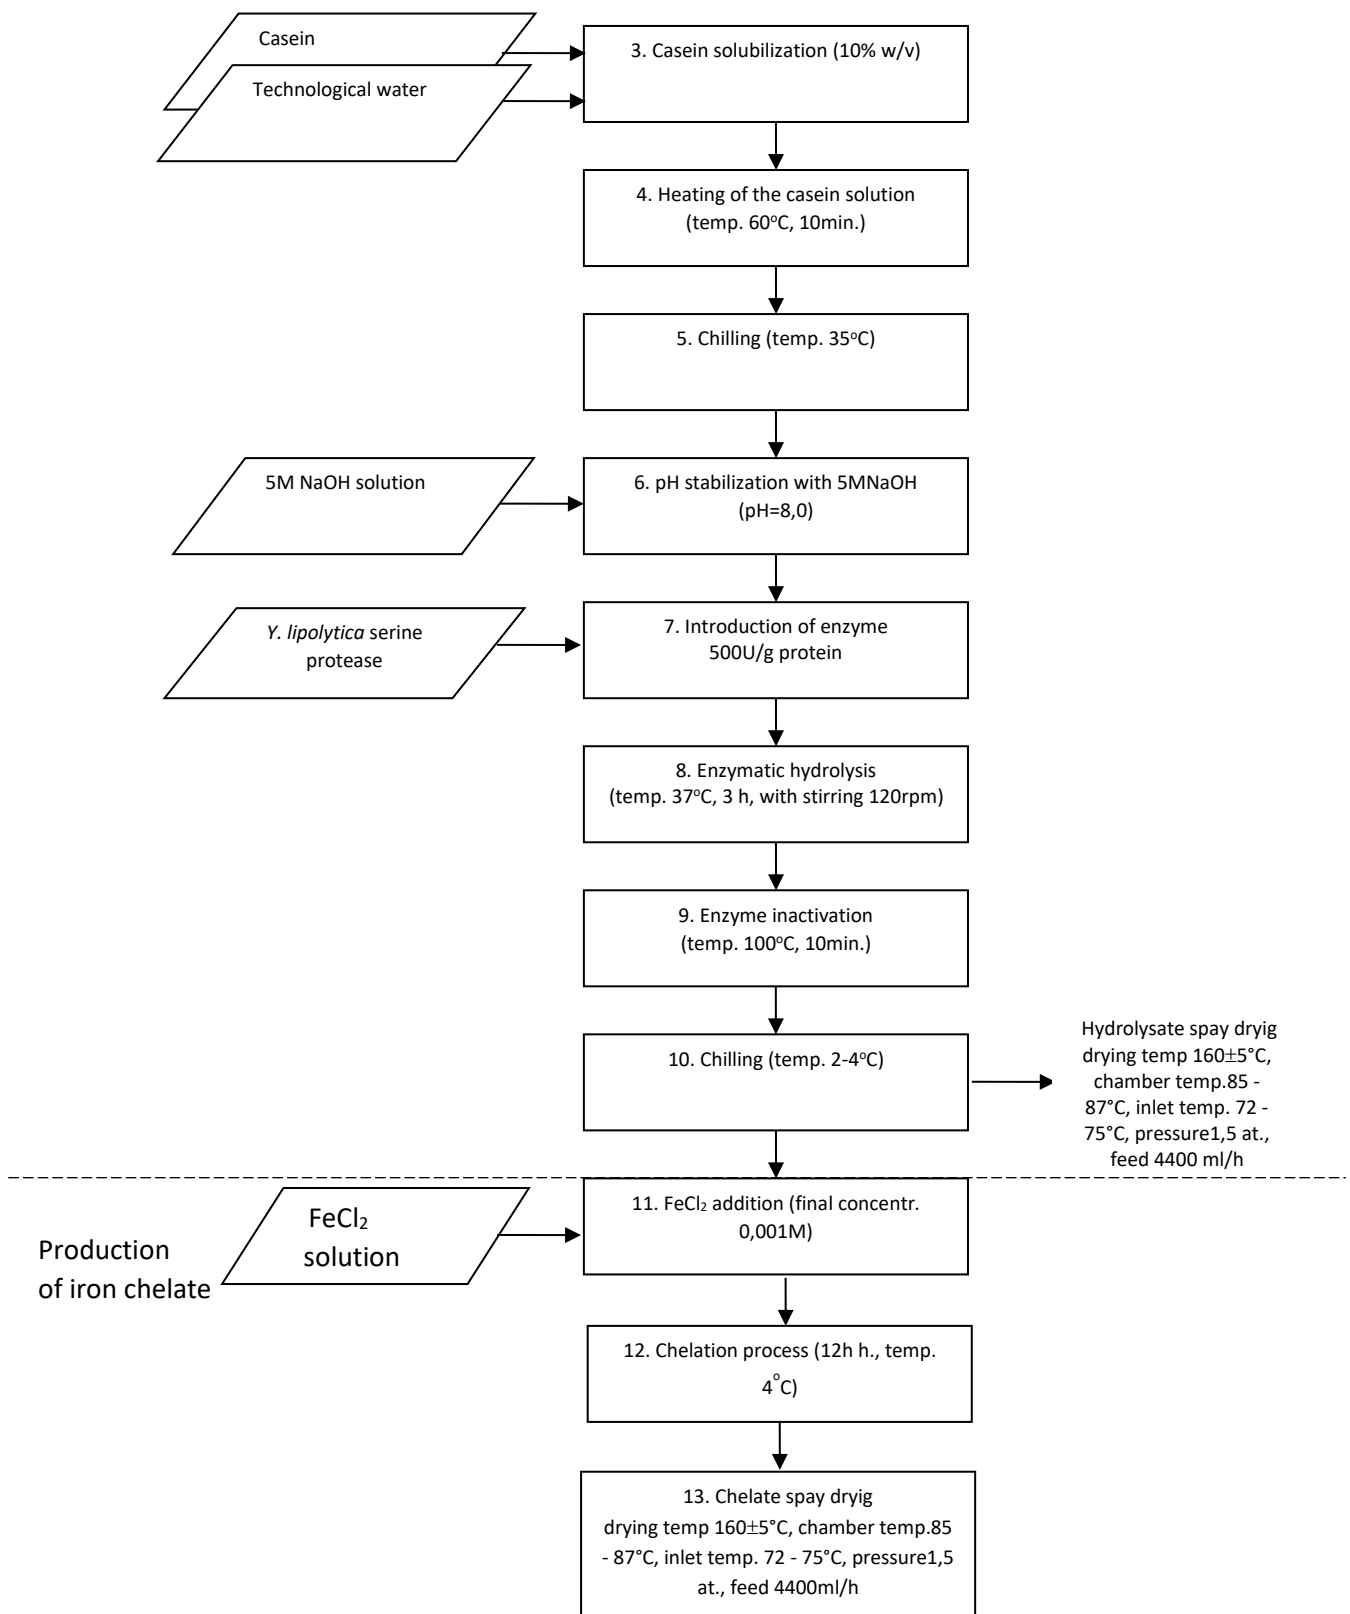

**Table S1. Sensory analysis tables**

| Colour                   |                     |       |        |                            |
|--------------------------|---------------------|-------|--------|----------------------------|
| Sample                   | characteristics     | white | creamy | odd: like green/grey/other |
|                          | skimmed milk powder |       |        |                            |
| Yoghurt with addition of | casein hydrolysate  |       |        |                            |
|                          | casein-iron chelate |       |        |                            |

| Aroma                    |                     |            |       |         |        |                                |
|--------------------------|---------------------|------------|-------|---------|--------|--------------------------------|
| Sample                   | characteristics     | refreshing | clean | typical | acidic | odd-like metallic/yeasty/other |
| Yoghurt with addition of | skimmed milk powder |            |       |         |        |                                |
|                          | casein hydrolysate  |            |       |         |        |                                |
|                          | casein-iron chelate |            |       |         |        |                                |

| Consistency              |                     |       |       |       |            |         |
|--------------------------|---------------------|-------|-------|-------|------------|---------|
| Sample                   | characteristics     | leaky | loose | dense | very dense | compact |
| Yoghurt with addition of | skimmed milk powder |       |       |       |            |         |
|                          | casein hydrolysate  |       |       |       |            |         |
|                          | casein-iron chelate |       |       |       |            |         |

| Taste                    |                     |          |            |        |                 |
|--------------------------|---------------------|----------|------------|--------|-----------------|
| Sample                   | characteristics     | pleasant | refreshing | acidic | with aftertaste |
|                          | skimmed milk powder |          |            |        |                 |
| Yoghurt with addition of | casein hydrolysate  |          |            |        |                 |
|                          | casein-iron chelate |          |            |        |                 |
